# Supplementary material for: Genomic Prediction of Wheat Grain Yield Using Machine Learning
Source: MDPI journal article supplement (doi:10.3390/agriculture12091406), 2022-09-06
Supplement: s1 [file s1]

Archive with 4 entries (4 files):
- loc1.zip
- loc2.zip
- loc3.zip
- SupplementaryMaterials_1871491.pdf
